# Supplementary material for: Compositional Effects on Indentation Mechanical Properties of Chemically Strengthened TiO2-Doped Soda Lime Silicate Glasses
Source: MDPI journal article supplement (doi:10.3390/ma15020577), 2022-01-13
Supplement: s1 [file s1]

# Compositional Effects on Indentation Mechanical Properties of Chemically Strengthened TiO<sub>2</sub> Doped Soda Lime Silicate Glass

Stefan Karlsson

Glass Unit, Department of Building and Real Estate, Division of Built Environment, RISE Research Institutes of Sweden, Vejdes plats 3, SE-352 52 Växjö, Sweden; stefan.karlsson@ri.se

Figure S1, S2 and S3 show the  $\Delta H_{cs}$  as a function of SiO<sub>2</sub>, TiO<sub>2</sub> and CaO content for series 1, series 2 and series 3 respectively. Please note that no error bars are shown but the error bars from Figures 2, 3 and 4 can work as a guide.

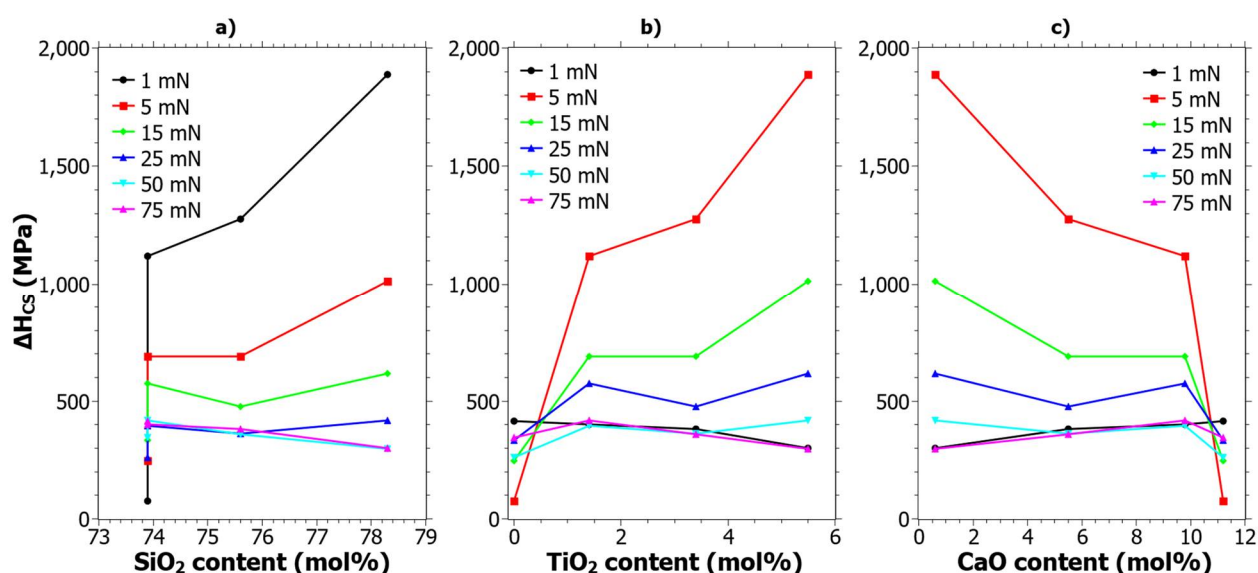

**Figure S1.**  $\Delta H_{cs}$  of series 1 for different nanoindentation loads as a function of a) SiO<sub>2</sub>, b) TiO<sub>2</sub> content and c) CaO content.

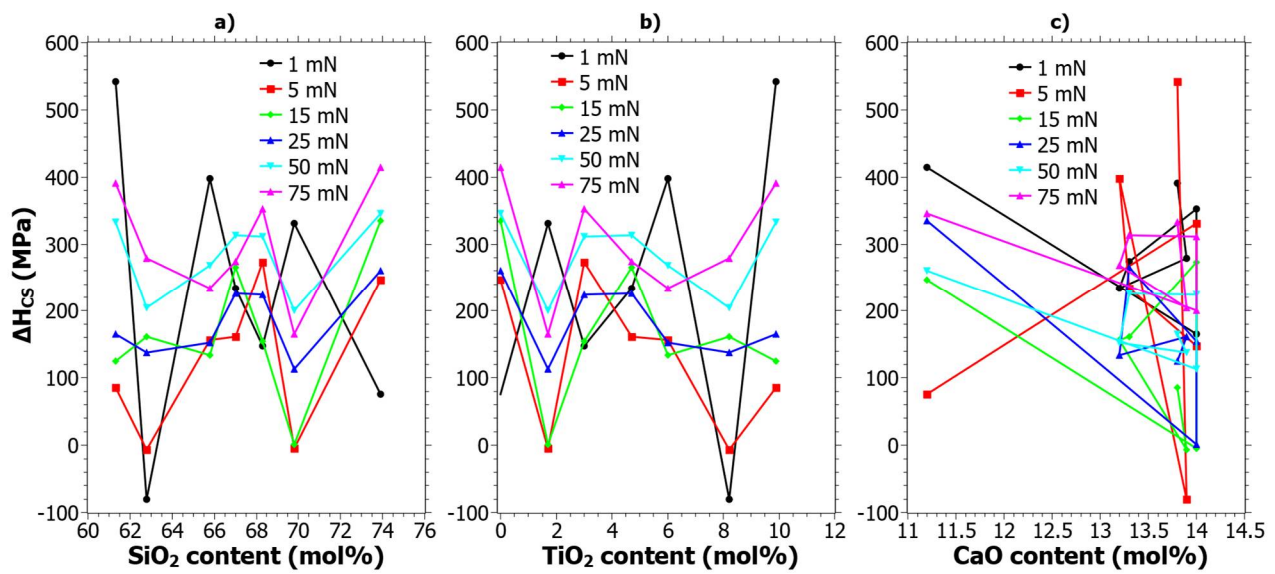

Figure S2.  $\Delta H_{cs}$  of series 2 for different nanoindentation loads as a function of a)  $\text{SiO}_2$ , b)  $\text{TiO}_2$  content and c)  $\text{CaO}$  content.

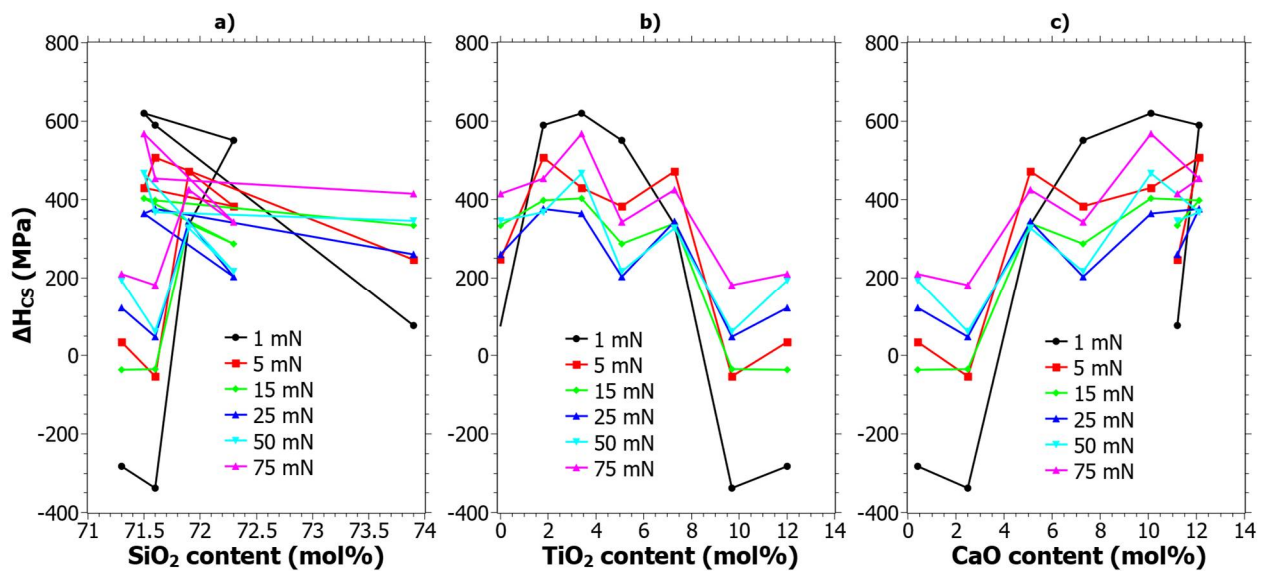

Figure S3.  $\Delta H_{cs}$  of series 3 for different nanoindentation loads as a function of a)  $\text{SiO}_2$ , b)  $\text{TiO}_2$  content and c)  $\text{CaO}$  content.

**Table S1.** The crack resistance (CR) results as well as fitting data  $x_c$  (characteristic value) and  $m$  (Weibull modulus) for the Weibull fit.

| Label | CR (N) | $x_c$ | $m$   |
|-------|--------|-------|-------|
| 1.1   | 0.307  | 0.36  | 2.52  |
| 1.2   | 0.655  | 0.75  | 2.73  |
| 1.3   | 0.935  | 0.96  | 11.82 |
| 1.4   | 1.106  | 1.2   | 4.32  |
| 2.2   | 0.307  | 0.36  | 2.52  |
| 2.3   | 0.249  | 0.26  | 9.24  |
| 2.4   | 0.315  | 0.39  | 1.72  |
| 2.5   | 0.226  | 0.24  | 4.56  |
| 2.6   | 0.179  | 0.2   | 3.59  |
| 2.7   | 0.401  | 0.51  | 1.51  |
| 3.2   | 0.466  | 0.5   | 5.93  |
| 3.3   | 0.307  | 0.36  | 2.52  |
| 3.4   | 0.666  | 0.72  | 4.97  |
| 3.5   | 0.485  | 0.55  | 2.74  |
| 3.6   | 0.647  | 0.73  | 3.16  |
| 3.7   | 1.425  | 1.5   | 7.15  |
